# Supplementary material
Source: PubMed Central journal article supplement (PMC8223639)
Supplement: thoraxjnl-2020-216651supp001.pdf [file thoraxjnl-2020-216651supp001.pdf]

## Supplement

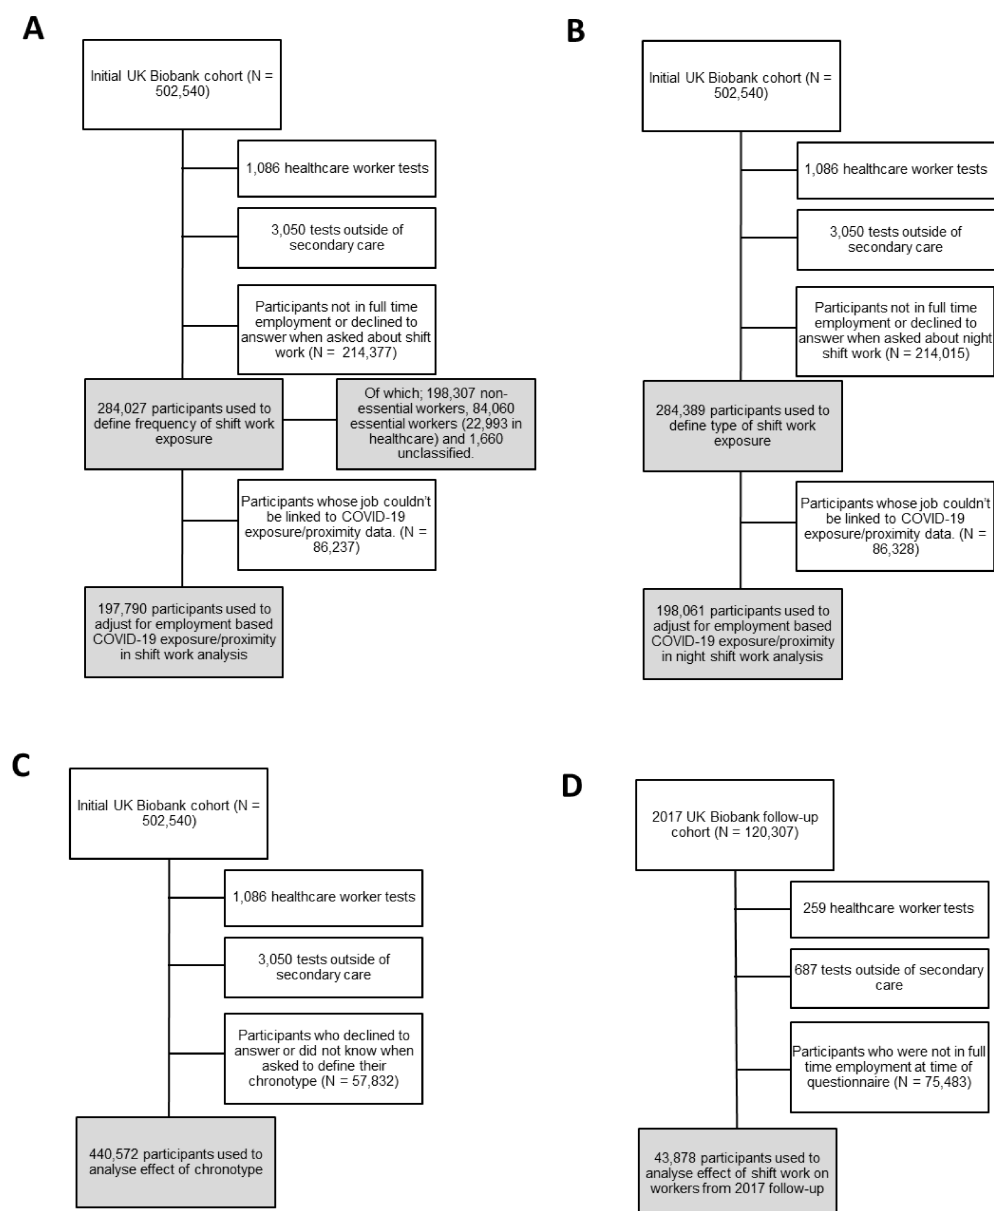

**Suppl. Figure 1: Strobe Diagram** Participants for this study were analysed in four groups. Shaded boxes show which cohorts were analysed in the paper. **A** Frequency of Shift work and Job Sector **B** Type of shift work **C** Chronotype and **D** 2017 occupational re-profiling

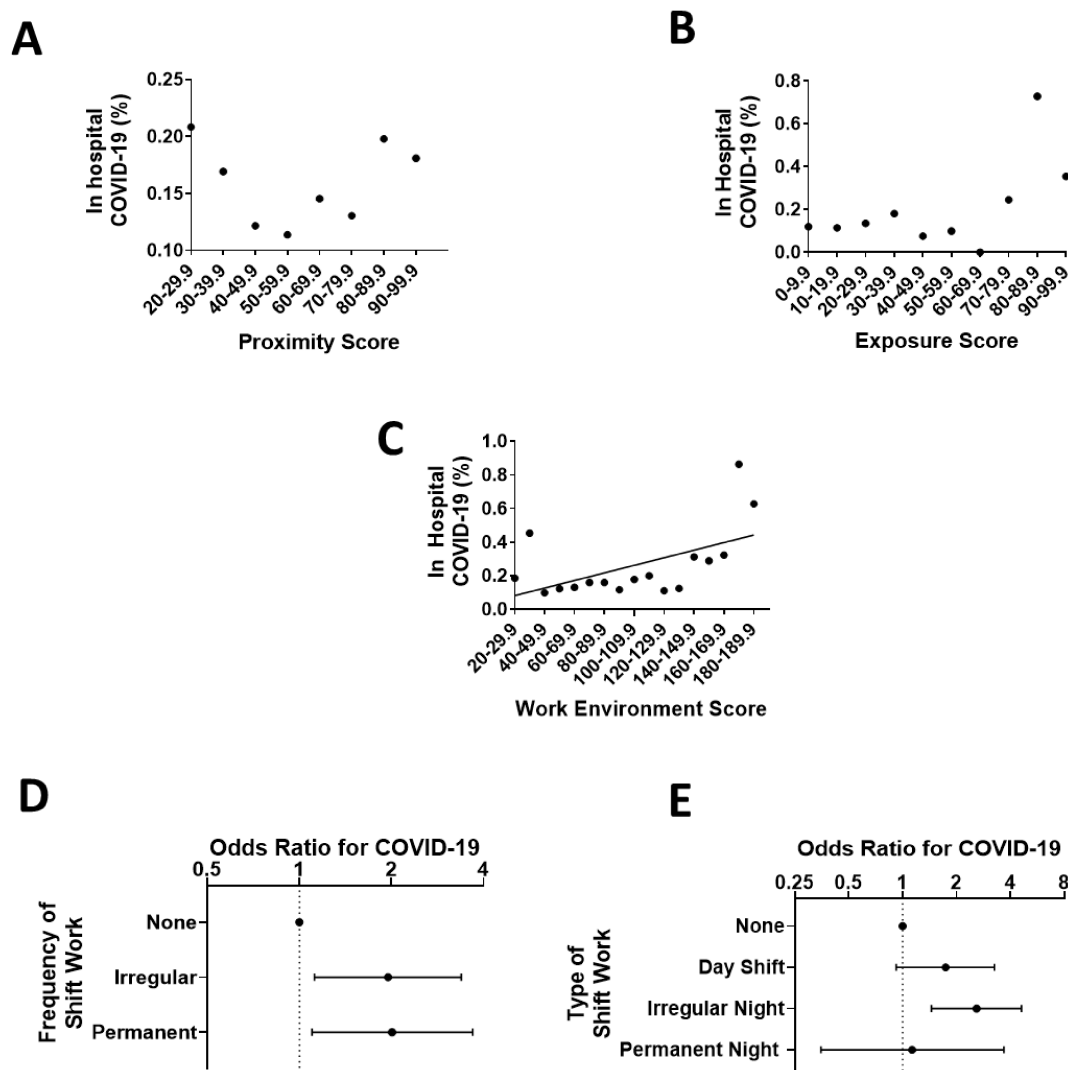

**Suppl. Figure 2: Effect of proximity and exposure through occupation on COVID-19 risk.**

Occupational codes from the UK Biobank were combined with proximity and exposure data from ONS. **A** Risk of COVID-19 as a function of physical proximity. **B** Risk of COVID-19 risk as a function of exposure. **C** Risk of COVID-19 as a function of the sum of proximity and exposure scores (work environment score). **D** Shows the association of frequency of shift work with COVID-19 when the covariates in Model 3 and the work environment score are included in the model **E** Shows the association of the type of shift work with COVID-19 when the covariates in Model 3 and the work environment score are included in the model. Where significant linear regression lines are shown.

|                             | Reported Type of shift work |                      |                            |                            | P values |
|-----------------------------|-----------------------------|----------------------|----------------------------|----------------------------|----------|
|                             | None                        | Day Shift Workers    | Irregular night shift work | Permanent night shift work |          |
| N                           | 235135                      | 24245                | 17971                      | 7038                       |          |
| Age (years)                 | 52.9 (7.12)                 | 52.5 (7.08)          | 51.11 (6.87)               | 51.48 (6.9)                | <0.01    |
| Sex (% male)                | 46.61                       | 47.68                | 62.76                      | 61.72                      | <0.01    |
| BMI (kg/m <sup>2</sup> )    | 27.09 (4.65)                | 27.79 (4.99)         | 28.22 (4.9)                | 28.5 (4.87)                | <0.01    |
| <b>Smoker (%)</b>           |                             |                      |                            |                            | <0.01    |
| Never                       | 58.11                       | 53.64                | 52.73                      | 52                         |          |
| Previous                    | 31.89                       | 32.08                | 30.64                      | 30.02                      |          |
| Current                     | 9.75                        | 13.92                | 16.15                      | 17.68                      |          |
| Smoking pack-years          | 19.99 (16)                  | 22.85 (17.49)        | 24.23 (17.75)              | 25.54 (18.32)              | <0.01    |
| Daily alcohol intake (%)    | 20.46                       | 16.95                | 16                         | 10.2                       | <0.01    |
| Sleep Duration (h)          | 7.05 (1.03)                 | 6.95 (1.22)          | 6.85 (1.3)                 | 6.67 (1.51)                | <0.01    |
| <b>Chronotype (%)</b>       |                             |                      |                            |                            | <0.01    |
| Morning                     | 23.34                       | 25.47                | 22.91                      | 19.22                      |          |
| Evening                     | 8.01                        | 7.88                 | 9.84                       | 16.93                      |          |
| <b>Ethnicity (%)</b>        |                             |                      |                            |                            | <0.01    |
| White British               | 88.5                        | 83.35                | 80.05                      | 81.05                      |          |
| White Other                 | 6.44                        | 7.08                 | 7.02                       | 6.02                       |          |
| Mixed                       | 0.65                        | 0.88                 | 0.97                       | 0.88                       |          |
| Asian                       | 1.71                        | 3.57                 | 3.8                        | 3.42                       |          |
| Black                       | 1.39                        | 2.66                 | 4.86                       | 5.36                       |          |
| Chinese                     | 0.34                        | 0.49                 | 0.45                       | 0.67                       |          |
| Other                       | 0.69                        | 1.61                 | 2.42                       | 2.26                       |          |
| Weekly work hours           | 34.24 (13.19)               | 34.98 (13.21)        | 39.33 (14.55)              | 39.62 (13.71)              | <0.01    |
| Single Occupancy (%)        | 15.63                       | 18.76                | 18.72                      | 18.49                      | <0.01    |
| Urban area (%)              | 85.98                       | 89.56                | 89.33                      | 90.97                      | <0.01    |
| Townsend Index              | -2.24 (-3.7 to 0.18)        | -1.31 (-3.18 to 1.6) | -1.25 (-3.17 to 1.8)       | -1.04 (-3.02 to 2.06)      | <0.01    |
| High Cholesterol (%)        | 7.88                        | 8.57                 | 8.55                       | 9.29                       | <0.01    |
| Diabetes (%)                | 3.22                        | 4.28                 | 4.62                       | 4.62                       | <0.01    |
| Hypertension (%)            | 20.33                       | 22.24                | 22.06                      | 23.26                      | <0.01    |
| Depression (%)              | 4.61                        | 5.47                 | 4.52                       | 4.69                       | <0.01    |
| Cardiovascular Disease (%)  | 2.27                        | 2.72                 | 2.49                       | 2.9                        | <0.01    |
| Impaired Renal Function (%) | 0.09                        | 0.14                 | 0.08                       | 0.09                       | 0.15     |
| Defined Asthma (%)          | 4.93                        | 5.28                 | 4.79                       | 5.14                       | 0.06     |
| COPD (%)                    | 0.13                        | 0.23                 | 0.19                       | 0.13                       | <0.01    |
| Liver Disease (%)           | 0.53                        | 0.49                 | 0.58                       | 0.5                        | 0.57     |

**Suppl. Table 1: Demographics by type of shift work: (n=284,389)** Variables are expressed as mean ( $\pm$ SD) or as percentages. P values show whether there is a significant difference between groups (ANOVA).

|                        | Shift Work Type |                   |                               |                               | P values |
|------------------------|-----------------|-------------------|-------------------------------|-------------------------------|----------|
|                        | None            | Day Shift Workers | Irregular Night Shift Workers | Permanent night shift workers |          |
| N                      | 168,617         | 15,442            | 11,270                        | 4,340                         |          |
| Proximity Score        | 57.76 (13.1)    | 62.5 (13.63)      | 64.68 (13.93)                 | 64.69 (12.3)                  | <0.01    |
| Exposure Score         | 17.31 (17.94)   | 21.37 (19.31)     | 24.16 (23.59)                 | 22.1 (20.52)                  | <0.01    |
| Work Environment Score | 75.07 (28.05)   | 83.87 (28.37)     | 88.83 (34.29)                 | 86.8 (30.12)                  | <0.01    |

**Suppl. Table 2: Work environment score by type of shift work:** (n=198,061) Variables are expressed as mean ( $\pm$ SD). P values show whether there is a significant difference between groups (ANOVA).
